# Supplementary material for: Photocontrolled Dopamine Polymerization on DNA Origami with Nanometer Resolution
Source: PubMed Central journal article supplement (PMC7186833; doi:10.1002/anie.201911249), 2019-12-27
Supplement: ANIE-59-6144-s001.pdf [file ANIE-59-6144-s001.pdf]

Supporting Information

**Photocontrolled Dopamine Polymerization on DNA Origami with Nanometer Resolution**

*Pia Winterwerber, Sean Harvey, David Y. W. Ng,\* and Tanja Weil\**

anie\_201911249\_sm\_miscellaneous\_information.pdf

**Table of Contents****Experimental Procedures**

p. 3

Materials and Instruments  
DNA Origami Structures  
Polydopamine Formation on DNA Origami Structures  
Switch on – Switch off  
Reactive Oxygen Species Assay (ROS Assay)  
Binding Assay  
Template Degradation  
Stability Assay  
Agarose Gel Electrophoresis (AGE)  
Atomic Force Microscopy (AFM)

**Results and Discussion**

p. 5

Figure S2. AFM images of DNA origami templates before polymerization.  
Figure S3. Binding assay of protoporphyrin IX to G-quadruplex sequences.  
Figure S4. Binding specificity assay of protoporphyrin IX to different guanine-rich sequences.  
Figure S5. Proposed mechanism of polydopamine formation.  
Figure S6. Reactive oxygen assay (ROS) assay of protoporphyrin IX.  
Figure S7. Polymerization kinetics of dopamine at different pH values.  
Figure S8. Negative control of polydopamine formation in the dark.  
Figure S9. Role of the photosensitizer in the polymerization process.  
Figure S10. Investigation of the reactive oxygen species-mediated polymerization process.  
Figure S11. AFM imaging of the origami tubes after polymerization in the absence of oxygen.  
Figure S12. Agarose gel electrophoresis (AGE) of scaffold DNA, tubes before polymerization, and tubes after polymerization.  
Figure S13. Effects of polydopamine coating on structural behavior of the tubes.  
Figure S14. Degradation of the DNA template.  
Staple DNA Sequences

**References**

p. 15

## SUPPORTING INFORMATION

## Experimental Procedures

## Materials and Instruments

All solvents and chemicals were purchased from commercial sources and were used without further purification (Disodium ethylenediaminetetraacetic acid ( $\text{Na}_2\text{EDTA}$ ), Sigma; Trizma<sup>®</sup> Base (TRIS), Sigma; polyethylene glycol 8000 ( $\text{PEG}_{8000}$ ), Roth; protoporphyrin IX (PPIX), Sigma; dopamine hydrochloride, Sigma; Sephacryl S-400 HR, GE Healthcare; *N,N*-dimethyl-4-nitrosoaniline (RNO), Sigma; imidazole, Roth; SYBR gold, Thermo Fisher Scientific; DNA gel loading dye, Thermo Fisher Scientific). DNA staple strands, G-quadruplex extended staple strands, and folding strands were purchased from Sigma. M13mp18 plasmid DNA was synthesized according to the literature.<sup>[1]</sup> Annealing of scaffold DNA and the respective staple strands was performed on a Bio-Rad MyCycler<sup>™</sup> Thermal Cycler. UV/Vis and fluorescence spectroscopy were conducted on a Spark<sup>®</sup> Multimode Microplate Reader by Tecan.

## DNA Origami Structures

DNA origami tiles were prepared by mixing M13mp18 Scaffold DNA (1 equiv.), staple strands (8 equiv.) and G-quadruplex extended staple strands (8 equiv.) in origami buffer (1 mM  $\text{Na}_2\text{EDTA}$ , 5 mM NaCl, 5 mM TRIS, 12 mM  $\text{MgCl}_2$  pH 8). To form tube structures, staple strands located at the long edges of the tile were replaced by folding strands (2 equiv.), respectively. Annealing was performed by running a program from 70 °C to 20 °C over 2 hours (0.5 °C/min to 35 °C, 1 °C/min to 20 °C) and the obtained DNA origami structures were purified by PEG precipitation.<sup>[2]</sup> Therefore, the PEG solution (15%  $\text{PEG}_{8000}$  (w/v), 5 mM TRIS, 1 mM  $\text{Na}_2\text{EDTA}$ , 505 mM NaCl) was added to the reaction solution at a volume ratio of 1:1 and centrifuged for 25 min at 12.5 rpm, room temperature (RT). The supernatant was removed and the resuspended pellet was precipitated by applying the PEG precipitation method for additional 2 times. Sample concentration was determined by Spark<sup>®</sup> 20M with Nanoquant plate<sup>™</sup>. DNA origami structures were stored in origami buffer at 4 °C.

## Polydopamine Formation on DNA Origami Structures

Standard polydopamine formation on DNA origami structures was carried out in a total reaction volume of 50  $\mu\text{L}$  (or 100  $\mu\text{L}$ , respectively) in a UV-star 384 well plate. Stock solutions of compounds were prepared in reaction buffer (10 mM BIS-TRIS, pH 6.5) at the following concentrations: protoporphyrin IX (PPIX) at 10  $\mu\text{M}$  and dopamine hydrochloride at 0.5 M. A typical reaction was conducted as follows: DNA origami with G4-sequences (10 nM, final concentration) was incubated with PPIX (1.5 equiv., relative to the amount of G4-sequences) in reaction buffer for 30–60 min. Dopamine hydrochloride (10 mM, final concentration) was added and the plate was placed on a shaker (300 rpm), in a distance of approximately 1 cm to the LED array light source (cold white LED, 4600 K–9000 K, 3.0 mW/cm<sup>2</sup>, purchased from Thorlabs, Inc., see Figure S1). After a predetermined irradiation time interval, polymerization was stopped by removing the light source and polydopamine-DNA objects were purified using size exclusion chromatography (200  $\mu\text{L}$  Sephacryl S-400 HR, equilibrated with reaction buffer; centrifuge settings: 2 min, 0.8 g, RT).

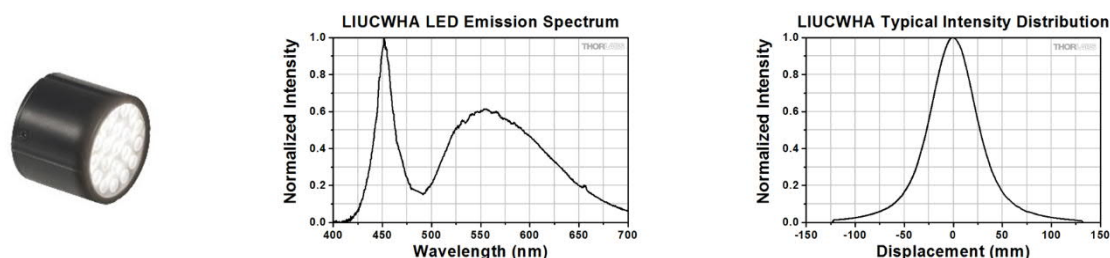

**Figure S1.** Cold white LED array employed in this study (left). Normalized emission spectrum of the cold white LED array (middle). Intensity distribution of the LED in the plane located 100 mm from the LED along the emission axis (right). Adapted from Manufacturer's specifications Thorlabs, Inc.

## Polydopamine Formation in the Absence of Oxygen

In order to allow degassing of the system, the polymerization was conducted in 0.2 mL PCR tubes. The reaction mixture was prepared accordingly to the standard conditions. Imidazole stock solution in reaction buffer (0.5 M; adjusted to approx. pH 6.5) was applied at a final concentration of 100 mM. Oxygen was removed by gently degassing with Argon. To perform UV-Vis spectroscopy, the reaction solution was transferred to a 384 well plate, using the exact wells as the measurement before. The solutions were degassed after each measurement. After a reaction time of 180 min, work-up was conducted as described above.

## Switch on – Switch off

Switch on – switch off studies were performed according to standard polydopamine formation protocol either on a shaker with 1 cm distance to the light source (irradiation phase) or in the Tecan plate reader (dark phase) for 1 h, respectively. Absorbance scans were conducted during the dark phase at  $t = 0, 15, 30, 45, 60$  min. The reaction mixture was prepared in a 3.1-fold excess and split into 3 wells, whereas well 1, 2, and 3 were exposed to 1, 2, and 3 reaction cycles (1 h dark, 1 h irradiation), respectively. After each cycle, the corresponding reaction mixture was purified as described above for AFM imaging.

## Reactive Oxygen Species Assay (ROS Assay)

## SUPPORTING INFORMATION

Reactive oxygen species assay of PPIX was conducted in a total reaction volume of 150  $\mu\text{L}$  in a 96 well plate. Wells were charged with PPIX (6.6  $\mu\text{M}$ ), *N,N*-dimethyl-4-nitrosoaniline (RNO, 70.7  $\mu\text{M}$ ) and imidazole (7.5 mM) in BIS-TRIS buffer (pH 6.5) and either exposed to visible light (cold white LED, 4600 K–9000 K, 3.0 mW/cm<sup>2</sup>) or kept in dark. Absorbance scans from 300–500 nm were conducted at  $t = 0, 30, 90, 150, 210$  min. The decrease in absorbance of RNO could be followed at 438 nm.

**Binding Assay**

Binding assay of PPIX and G4-sequences on DNA origami were performed in a total reaction volume of 16.6  $\mu\text{L}$  in a black 384 well plate. PPIX (660 nM) in BIS-TRIS buffer (pH 6.5) was incubated with either DNA origami tile in origami buffer (10 nM) ("bound PPIX") or the same amount of blank origami buffer ("free PPIX"). Excitation wavelength was set at 420 nm and emission scans were recorded from 550–800 nm (bandwidth: 50 nm) every 5 min. Blank values were collected before PPIX addition.

**Binding Specificity Assay**

Binding specificity assay of PPIX and two different G-rich sequences (G4: 5'-TTTTGGGTAGGGCGGGTTGGG-3' and 12G: 5'-TTTTGAGTGCGAGTGCGAGTGCGAGTGC-3') was performed in a total reaction volume of 16.6  $\mu\text{L}$  in a black 384 well plate. PPIX (660 nM) in BIS-TRIS buffer (pH 6.5) was incubated with DNA origami tubes in origami buffer (10 nM), bearing either a ring of G4 sequences ("Origami G4") or 12G sequences ("Origami 12G"). Excitation wavelength was set at 420 nm and emission scans were recorded from 600–800 nm (bandwidth: 20 nm) before and after addition of the origami structures.

**Template Degradation**

Polydopamine-coated DNA origami was added to a freshly cleaved mica substrate and incubated for 5 min to allow deposition. After selecting a suitable scanning area and taking an image, the scanner head was lifted in the z-direction. Few  $\mu\text{L}$  of 1 M HCl were added to the droplet of the origami buffer covering the mica surface, incubated for 5 min and the surface was approached again. Slight manual corrections in x- and y-direction were necessary to reimage previously observed areas.

**Stability Assay**

Desalting of samples was achieved by spin filtering with Amicon Ultra-0.5 mL Centrifugal Filters (MWCO 100K). 1  $\mu\text{L}$  of precursor DNA origami (50 nM) or 5  $\mu\text{L}$  of polydopamine-coated DNA origami (approx. 10 nM) were diluted with Milli-Q water to a total volume of 100  $\mu\text{L}$  and centrifuged for 20 min at 12.5 g, RT. The concentrate volume of 15  $\mu\text{L}$  was then refilled up to 100  $\mu\text{L}$  with Milli-Q water, centrifuged, and the procedure was repeated two more times. After 1:1 (v/v) dilution with Milli-Q water, samples were incubated at 37 °C for 4 h and applied to mica substrate for AFM imaging. Final concentration of magnesium ions was calculated as 0.2  $\mu\text{M}$ , based on a dead volume after spin filtering of 15  $\mu\text{L}$ .

**Agarose Gel Electrophoresis (AGE)**

Agarose gel electrophoresis was performed on 1% agarose gels based on 0.5  $\times$  Tris-Borate-EDTA (TBE, diluted from 10  $\times$  TBE buffer concentrate from Sigma-Aldrich), equipped with 8 wells. The gels were run on ReadySub-Cell GT Cells from Bio-Rad using 0.5  $\times$  TBE buffer as the running buffer. DNA Gel Loading dye (6  $\times$ ) was used for sample preparation (approximately 50 fmol origami) with a total volume of 6  $\mu\text{L}$ . Electrophoresis was conducted at 90 V for 90 minutes on ice. Gels were subsequently stained with SYBR Gold in 50 mL 0.5  $\times$  TBE buffer for 30 min and image was taken with G:BOX Chemi Gel Doc System from Syngene.

**Atomic Force Microscopy (AFM)**

Atomic force microscopy was conducted in liquid state with a Bruker Dimension FastScan Bio™ atomic force microscope, which was operated in PeakForce mode. AFM probes with a nominal spring constant of 0.25 Nm<sup>-1</sup> (FastScan-D, Bruker) were used. Sample solution (30  $\mu\text{L}$ , 1–2 nM in origami buffer) was added onto a freshly cleaved mica substrate (circular, 15 mm) and incubated for 5 min to allow deposition of the origami structures. Remaining solution was removed and 300  $\mu\text{L}$  origami buffer was applied onto the mica surface, forming a droplet for measuring in liquid. Samples were scanned with scan rates between 1 and 2 Hz. Images were processed with NanoScope Analysis 1.8.

## SUPPORTING INFORMATION

## Results and Discussion

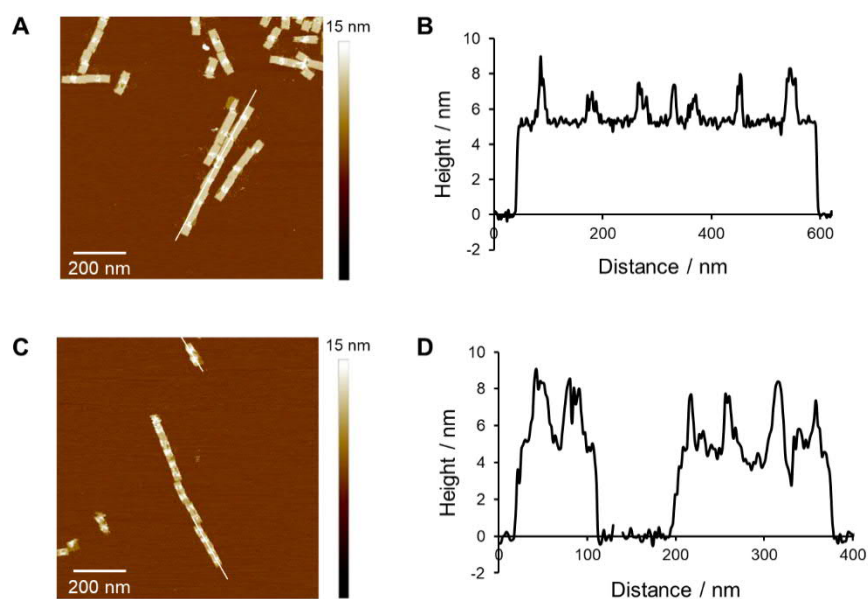

**Figure S2. AFM characterization of DNA origami templates before polymerization.** AFM topographic images of (A) a tube with 1 centered line of G-quadruplex (G4) sequences (tube I) and the corresponding height profile (B), and (C) a tube with 2 lines of G4 sequences (tube II) and the corresponding height profile (D).

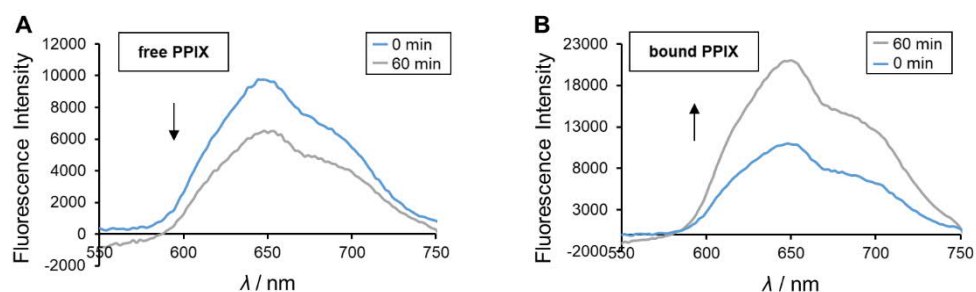

**Figure S3. Binding assay of protoporphyrin IX to G-quadruplex sequences.** Fluorescence intensity of protoporphyrin IX (PPIX) as (A) “free PPIX” and (B) “PPIX bound” to G-quadruplex sequences within the DNA origami framework. Upon binding, fluorescence significantly increases over time (60 min), whereas fluorescence of free PPIX in solution decreases. Spectra are blank-corrected.

## SUPPORTING INFORMATION

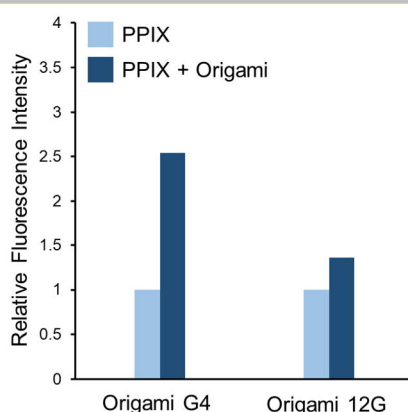

**Figure S4. Binding specificity assay of protoporphyrin IX to different guanine-rich sequences.** Upon addition of origami tubes bearing either G4 sequences ("Origami G4") or origami tubes with an alternately organized G-rich sequence ("Origami 12G"), only the fluorescence of the Origami G4-treated photosensitizer significantly increases, demonstrating a specific binding event.

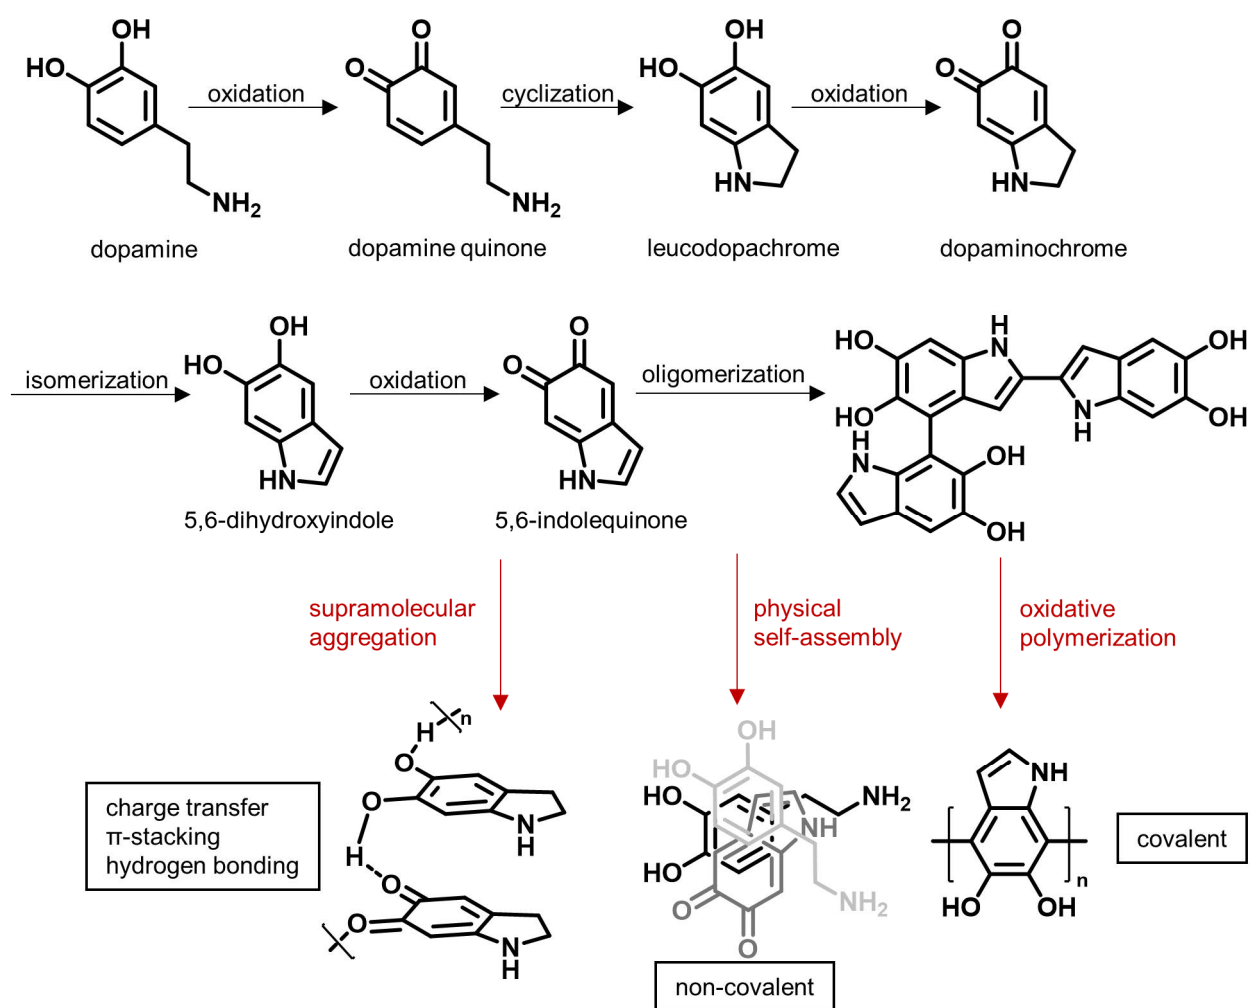

**Figure S5. Proposed mechanism of polydopamine formation.** After several oxidation steps, cyclization and isomerization, different pathways are suggested to contribute to the complex and many-faceted structure of polydopamine. Apart from covalent interactions generating oligomers and polymers, physical self-assembly and supramolecular aggregation based on charge transfer,  $\pi$ -stacking and hydrogen bonding are determining the polymer's structure. For reason of clarity and simplicity, only the main representative examples are depicted.<sup>[3]</sup>

## SUPPORTING INFORMATION

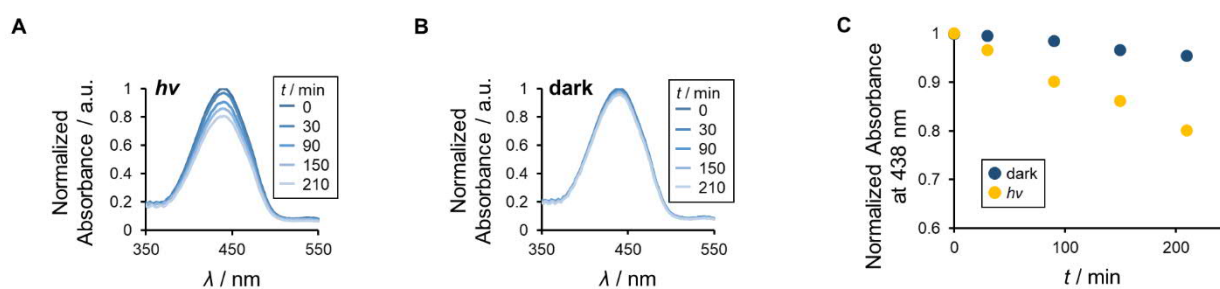

**Figure S6. Reactive oxygen species (ROS) assay of protoporphyrin IX (PPIX).** Singlet oxygen generated by PPIX upon irradiation with visible light reacts with imidazole and bleaches *N,N*-dimethyl-4-nitrosoaniline (RNO) through oxidation (A), while no reaction occurs in the absence of light (B). Absorbance of RNO was followed at 438 nm (C).

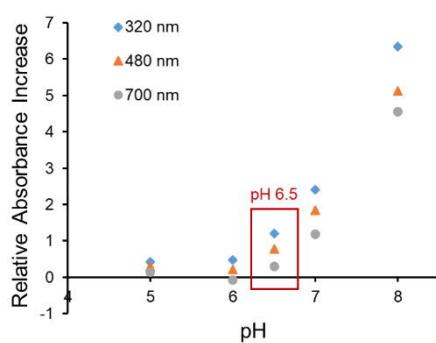

**Figure S7. Polymerization kinetics of dopamine at different pH values.** For pH studies, the following buffers were employed: pH 5: acetate buffer 10 mM, pH 6 and pH 7: phosphate buffer 10 mM, pH 6.5: BIS-TRIS buffer 10 mM, and pH 8: TRIS buffer 5 mM. Data collected at  $t = 120$  min.

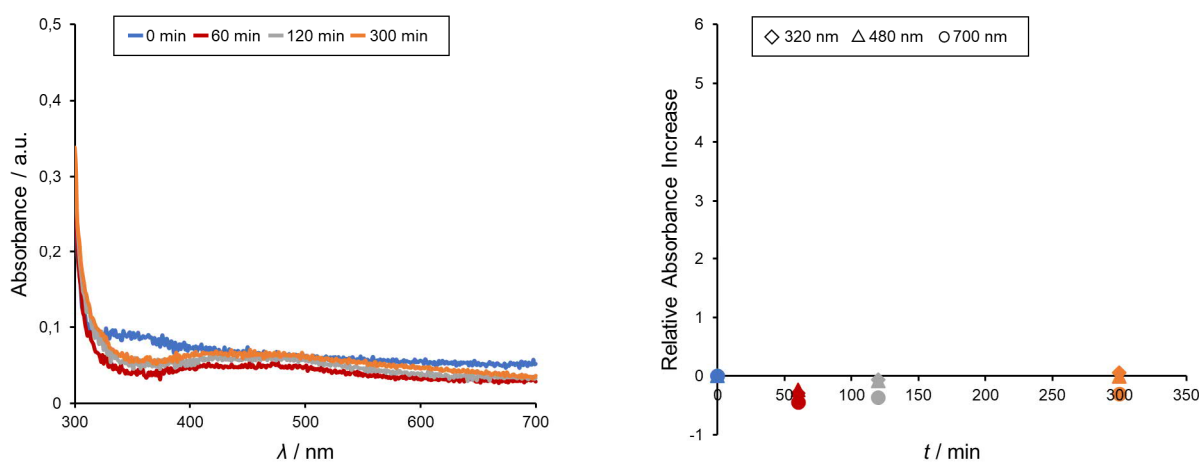

**Figure S8. Negative control of polydopamine formation in the dark.** UV/Vis spectroscopy of polydopamine formation on DNA origami tiles in BIS-TRIS buffer at pH 6.5 in the absence of light. Neither dopaminochrome, nor oligomer or polymer formation could be detected under these conditions.

## SUPPORTING INFORMATION

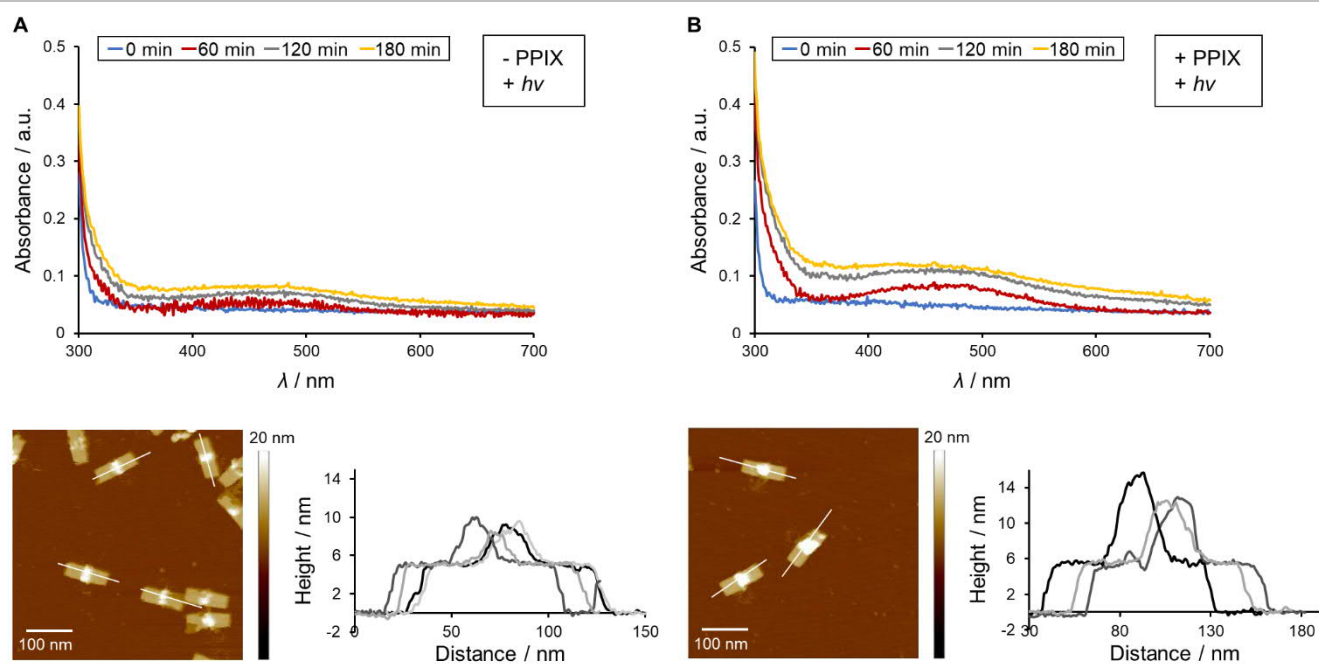

**Figure S9. Role of the photosensitizer in the polymerization process.** (A) Without protoporphyrin IX (PPIX), no polymerization takes place upon the irradiation with visible light, as visualized by UV/Vis spectroscopy and AFM. (B) Upon the embedding of PPIX and illumination, polydopamine formation is observed.



## SUPPORTING INFORMATION

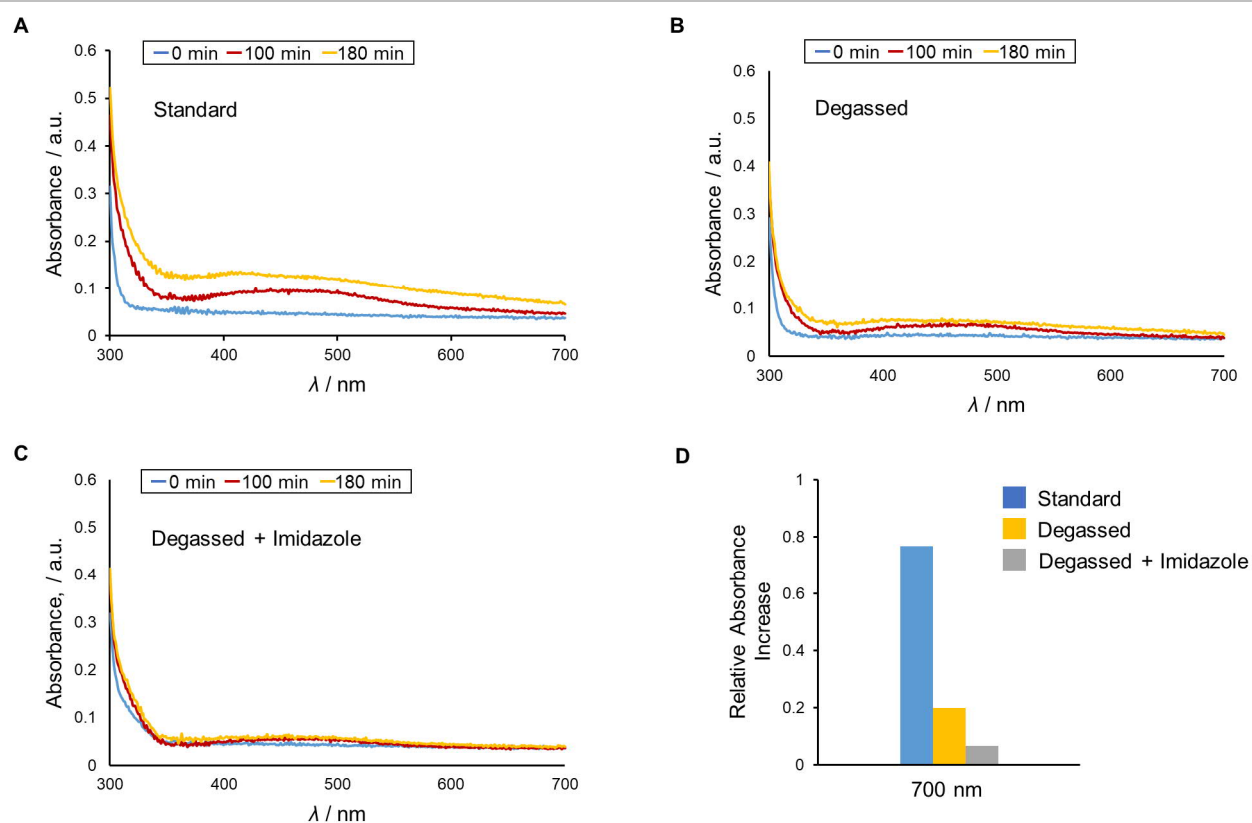

Figure S10. Investigation of the reactive oxygen species-mediated polymerization process under (A) standard conditions, (B) in the absence of oxygen and (C) in the absence of oxygen but in the presence of imidazole as a scavenger, visualized by UV-Vis spectroscopy. Thereby, the formation of polydopamine is significantly suppressed (D).

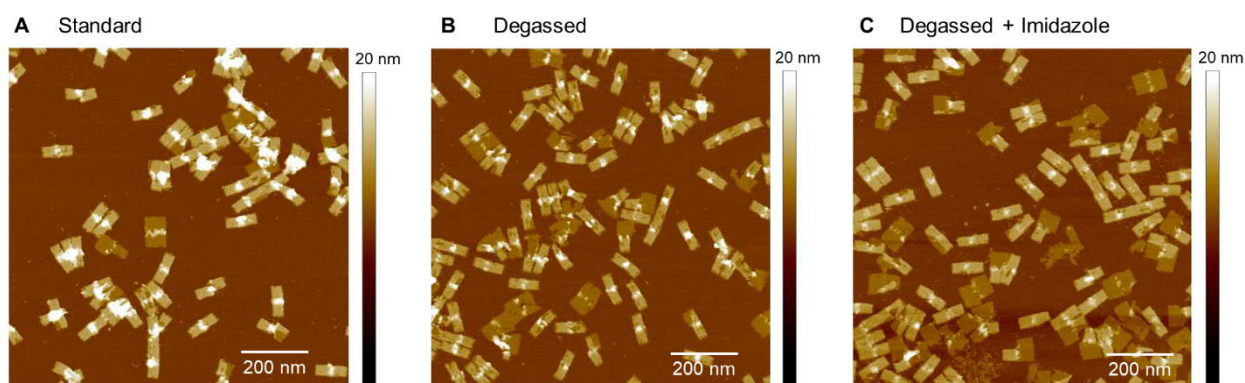

Figure S11. AFM imaging of the origami tubes after reaction under (A) standard, (B) degassed and (C) degassed and imidazole-added conditions also show a suppression of polydopamine formation in the absence of oxygen.

## SUPPORTING INFORMATION

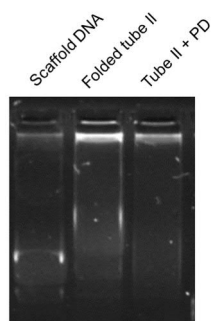

**Figure S12. Agarose gel electrophoresis (AGE) of scaffold DNA, tubes before polymerization, and tubes after polymerization.** Lanes were charged with scaffold DNA, folded origami tube II before polymerization, and polydopamine-coated tube II after polymerization. A shift in molecular weight upon folding is observed. Upon polydopamine-coating, migration of the polymer-DNA hybrid materials is completely suppressed. For reason of clarity, excess staples in the low molecular weight region are not shown.

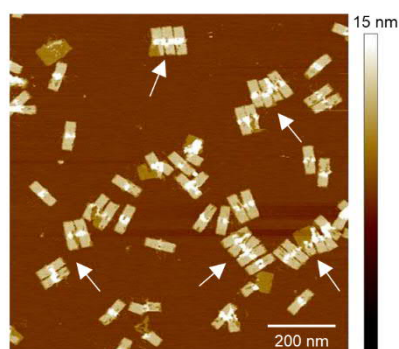

**Figure S13. Effects of polydopamine coating on structural behavior of the tubes.** Due to the adhesiveness of polydopamine, tubes stick to each other, forming higher-order domains.

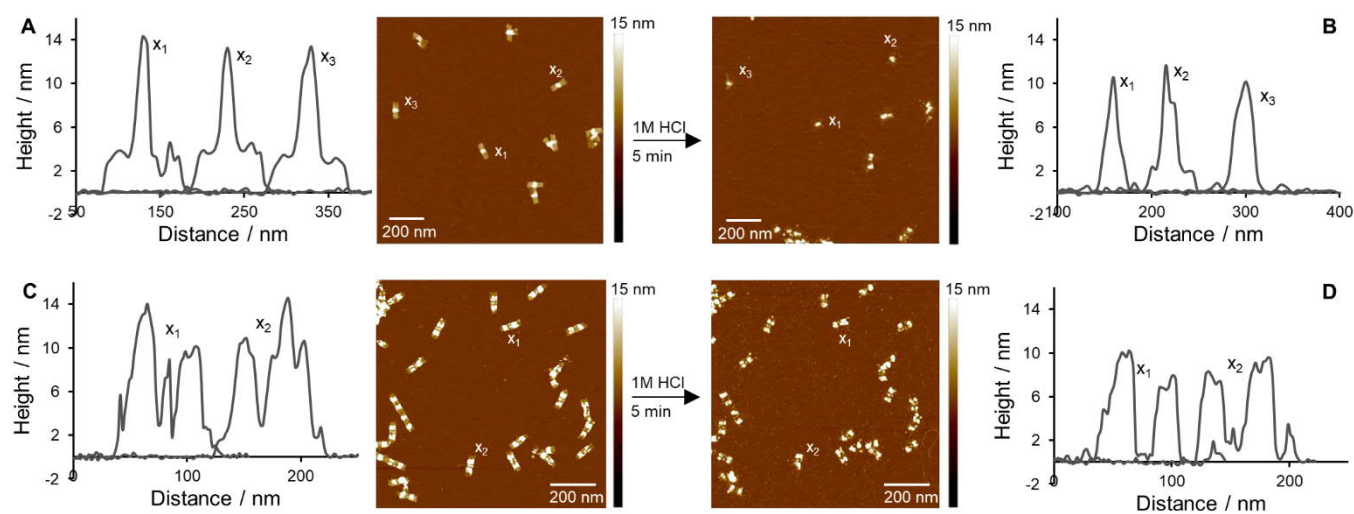

**Figure S14. Degradation of the DNA template.** Treatment of the polydopamine-coated origami tube I (A) and tube II (C) with hydrochloric acid during AFM measurements. Upon the addition of acid, the DNA template is degraded, liberating the polydopamine structures (B+D).

## SUPPORTING INFORMATION

**Staple DNA Sequences**

DNA origami structures were synthesized together with M13mp18 Scaffold DNA according to the following protocol. For G-quadruplex extended staple strands (G4 staple strands), the sequence of the corresponding staple strand is extended at the 3' end by 5'-TTTTGGGTAGGGCGGGTTGGG-3'.

**Tile:** G4 strands on positions 29, 30, 31–40, 41–50, 53–60, 61–70, 71–74; staple strands on remaining positions

**Tube I:** G4 strands on positions 2–10, 11–20, 21–24, 26, 112–120, 121–130, 131; folding strands on positions 1, 25, 27, 28, 51, 52, 75, 76, 99, 100, 111, 132, 133, 156, 157, 180, 181, 204, 205, 216; staple strands on remaining positions

**Tube II:** G4 strands on positions 29, 30, 31–40, 41–50, 53–60, 61–70, 71–74, 134–140, 141–150, 151–155, 158–160, 161–170, 171–179; folding strands on positions 1, 25, 27, 28, 51, 52, 75, 76, 99, 100, 111, 132, 133, 156, 157, 180, 181, 204, 205, 216; staple strands on remaining positions

**Table S1. Sequences of staple strands and folding strands.**

| Position | Sequence 5' → 3'                  |
|----------|-----------------------------------|
| 1        | CAAGCCCAATAGGAACCCATGTACAAACAGTT  |
| 2        | AATGCCCGTAAACAGTGCCCGTATCTCCCTCA  |
| 3        | TGCCTTGACTGCCTATTTTCGGAACAGGGATAG |
| 4        | GAGCCGCCCCACCACCGGAACCGCGACGGAAA  |
| 5        | AACCAGAGACCCTCAGAACCGCCAGGGGTCAG  |
| 6        | TTATTCATAGGGAAGGTAATATTCATTCAGT   |
| 7        | CATAACCCGAGGCATAGTAAGAGCTTTTTAAG  |
| 8        | ATTGAGGGTAAAGGTGAATTATCAATCACCGG  |
| 9        | AAAAGTAATATCTTACCGAAGCCCTTCCAGAG  |
| 10       | GCAATAGCGCAGATAGCCGAACAATTCAACCG  |
| 11       | CCTAATTTACGCTAACGAGCGTCTAATCAATA  |
| 12       | TCTTACCAGCCAGTTACAAAATAAATGAAATA  |
| 13       | ATCGGCTGCGAGCATGTAGAAACCTATCATAT  |
| 14       | CTAATTTATCTTTCCCTTATCATTTCCTGAA   |
| 15       | GCGTTATAGAAAAAGCCTGTTTAGAAGGCCGG  |
| 16       | GCTCATTTTCGCATTAATTTTTGAGCTTAGA   |
| 17       | AATTAACAAAATCTTACCAGTAATCCCATC    |
| 18       | TTAAGACGTTGAAAACATAGCGATAACAGTAC  |
| 19       | TAGAATCCCTGAGAAGAGTCAATAGGAATCAT  |
| 20       | CTTTTACACAGATGAATATACAGTAAACAATT  |
| 21       | TTAACGTTTCGGGAGAAACAATAATTTCCCT   |
| 22       | CGACAATAAGTATTAGACTTTACAATACCGA   |
| 23       | GGATTTAGCGTATTAATCCTTTGTTTTCAGG   |
| 24       | ACGAACCAAAACATCGCCATTAATGGTGGTT   |
| 25       | GAACGTGGCGAGAAAGGAAGGGAACAACTAT   |
| 26       | TAGCCCTACCAGCAGAAGATAAAAAACATTTGA |
| 27       | CGGCCTTGCTGGTAATATCCAGAACGAACTGA  |
| 28       | CTCAGAGCCACCACCCTCATTTTCCTATTATT  |
| 29       | CTGAAACAGGTAATAAGTTTTAACCCCTCAGA  |
| 30       | AGTGTAATGAAAGTATTAAGAGGCCGCCACC   |
| 31       | GCCACCACTTTTTATAATCAAACCGTCACC    |
| 32       | GTTTGCCACCTCAGAGCCGCCACCAGTACAGG  |
| 33       | GACTTGAGAGACAAAAGGGCGACAAGTTACCA  |
| 34       | AGCGCCAACCATTTGGGAATTAGATTATTAGC  |
| 35       | GAAGGAAAATAAGAGCAAGAAAACAACAGCCAT |
| 36       | GCCCAATACCGAGGAAACGCAATAGGTTTACC  |
| 37       | ATTATTTAACCCAGCTACAATTTTCAAGAACG  |
| 38       | TATTTTGCTCCCAATCCAAATAAGTGAGTTAA  |
| 39       | GGTATTAAGAACAAGAAAAATAATTAAGCCA   |
| 40       | TAAGTCCTACCAAGTACCGCACTCTTAGTTGC  |
| 41       | ACGCTCAAATAAGAATAAACACCGTGAATTT   |
| 42       | AGGCGTTACAGTAGGGCTTAATTGACAATAGA  |
| 43       | ATCAAAATCGTCGCTATTAATTAACGGATTCCG |

## SUPPORTING INFORMATION

|     |                                       |
|-----|---------------------------------------|
| 44  | CTGTAAATCATAGGTCTGAGAGACGATAAATA      |
| 45  | CCTGATTGAAAGAAATTGCGTAGACCCGAACG      |
| 46  | ACAGAAATCTTTGAATACCAAGTTCTTGCTT       |
| 47  | TTATTAATGCCGTCAATAGATAATCAGAGGTG      |
| 48  | AGATTAGATTTAAAAGTTTGAGTACACGTAAA      |
| 49  | AGGCGGTCATTAGTCTTTAATGCGCAATATTA      |
| 50  | GAATGGCTAGTATTAACACCGCCTCAACTAAT      |
| 51  | CCGCCAGCCATTGCAACAGGAAAAATATTTTT      |
| 52  | CCCTCAGAACCGCCACCCTCAGAACTGAGACT      |
| 53  | CCTCAAGAATACATGGCTTTTGATAGAACCAC      |
| 54  | TAAGCGTCGAAGGATTAGGATTAGTACCGCCA      |
| 55  | CACCAGAGTTCGGTCATAGCCCCCGCCAGCAA      |
| 56  | TGGCATTCCGCCGCCAGCATTGACGTTCCAG       |
| 57  | AATCACCAAATAGAAAATTCATATATAACGGA      |
| 58  | TCACAATCGTAGCACCATTACCATCGTTTTCA      |
| 59  | ATACCCAAGATAACCCACAAGAATAAACGATT      |
| 60  | ATCAGAGAAAGAAGTGGCATGATTTTATTTTG      |
| 61  | TTTTGTTTAAAGCCTTAAATCAAGAATCGAGAA     |
| 62  | AGGTTTTGAACGTCAAAAATGAAAGCGCTAAT      |
| 63  | CAAGCAAGACGCGCCTGTTTATCAAGAATCGC      |
| 64  | AATGCAGACCGTTTTTATTTTCATCTTGCGGG      |
| 65  | CATATTTAGAAATACCGACCGTGTACCTTTT       |
| 66  | AATGGTTTACAACGCCAACATGTAGTTCAGCT      |
| 67  | TAACCTCCATATGTGAGTGAATAAACAAAATC      |
| 68  | AAATCAATGGCTTAGGTTGGGTTACTAAATTT      |
| 69  | GCGCAGAGATATCAAAATTTTGGACATTATC       |
| 70  | AACCTACCGCAATTATTCATTTCCAGTACAT       |
| 71  | ATTTTGCCTCTTTAGGAGCACTAAGCAACAGT      |
| 72  | CTAAAATAGAACAAAGAAACCACCAGGGTTAG      |
| 73  | GCCACGCTATACGTGGCACAGACAACGCTCAT      |
| 74  | GCGTAAGAGAGAGCCAGCAGCAAAAAGGTTAT      |
| 75  | GGAAATACCTACATTTTGACGCTCACCTGAAA      |
| 76  | TATCACCGTACTCAGGAGGTTTAGCGGGGTTT      |
| 77  | TGCTCAGTCAGTCTCTGAATTTACCAGGAGGT      |
| 78  | GGAAAGCGACCAGGCGGATAAGTGAATAGGTG      |
| 79  | TGAGGCAGGCGTCAGACTGTAGCGTAGCAAGG      |
| 80  | TGCCTTTAGTCAGACGATTGGCCTGCCAGAAT      |
| 81  | CCGGAAACACACCACGGAATAAGTAAGACTCC      |
| 82  | ACGCAAAGGTCACCAATGAAACCAATCAAGTT      |
| 83  | TTATTACGGTCAGAGGGTAATTGAATAGCAGC      |
| 84  | TGAACAAACAGTATGTTAGCAAACCTAAAAGAA     |
| 85  | CTTTACAGTTAGCGAACCTCCCAGCTAGGAA       |
| 86  | GAGGCGTTAGAGAATAACATAAAAAGAACCCC      |
| 87  | TCATTACCCGACAATAAACACATATTTAGGC       |
| 88  | CCAGACGAGCGCCCAATAGCAAGCAAGAACGC      |
| 89  | AGAGGCATAATTTTCATCTTCTGACTATAACTA     |
| 90  | TTTTAGTTTTTCGAGCCAGTAATAAATTCTGT      |
| 91  | TATGTAAACCTTTTTAATGGAAAAATTACCT       |
| 92  | TTGAATTATGCTGATGCAAAATCCACAAATATA     |
| 93  | GAGCAAAAACCTCTGAATAATGGAAGAAGGAG      |
| 94  | TGGATTATGAAGATGATGAAACAAAATTTTCAT     |
| 95  | CGGAATTATTGAAAGGAATTGAGGTGAAAAAT      |
| 96  | ATCAACAGTCATCATATTCTGATTGATTGTT       |
| 97  | CTAAAGCAAGATAGAACCCTTCTGAATCGTCT      |
| 98  | GCCAACAGTCACCTTGCTGAACCTGTTGGCAA      |
| 99  | GAAATGGATTATTTACATTGGCAGACATTCTG      |
| 100 | TTTTTATAAGTATAGCCCCGGCCGTCGAG         |
| 101 | AGGGTTGATTTTATAAATCCTCATTAAATGATATTC  |
| 102 | ACAAACAATTTTAAATCAGTAGCGACAGATCGATAGC |

## SUPPORTING INFORMATION

|     |                                                   |
|-----|---------------------------------------------------|
| 103 | AGCACCGTTTTTAAAGGTGGCAACATAGTAGAAAA               |
| 104 | TACATACATTTTGACGGGAGAATTAECTACAGGGAA              |
| 105 | GCGCATTATTTGCTTATCCGGTATTCTAAATCAGA               |
| 106 | TATAGAAGTTTTGACAAAAGGTAAAGTAGAGAATA               |
| 107 | TAAAGTACTTTTCGCGAGAAAACCTTTTTATCGCAAG             |
| 108 | ACAAAGAATTTTATTAATTACATTTAACACATCAAG              |
| 109 | AAAACAAATTTTTTCATCAATATAATCCTATCAGAT              |
| 110 | GATGGCAATTTAATCAATATCTGGTCACAAATATC               |
| 111 | AAACCCTCTTTTACCAGTAATAAAAAGGGATTCACCAGTCACACGTTTT |
| 112 | CCGAAATCCGAAAATCCTGTTTTGAAGCCGGAA                 |
| 113 | CCAGCAGGGGCAAAATCCCTTATAAAGCCGGC                  |
| 114 | GCATAAAGTTCACACAACATACGAAGCGCCA                   |
| 115 | GCTCACAATGTAAAGCCTGGGGTGGGTTTGCC                  |
| 116 | TCGCCATTGCCGAAACCAGGCATTAATCA                     |
| 117 | GCTTCTGGTCAGGCTGCGCAACTGTGTTATCC                  |
| 118 | GTAAAATTTTAACCAATAGGAACCCGGCACC                   |
| 119 | AGACAGTCATTCAAAAGGGTGAGAAGCTATAT                  |
| 120 | AGGTAAAGAAATCACCATCAATATAATATTTT                  |
| 121 | TTTCATTTGGTCAATAACCTGTTTTATATCGCG                 |
| 122 | TCGCAAATGGGGCGCGAGCTGAAATAATGTGT                  |
| 123 | TTTTAATTGCCCGAAAGACTTCAAACACTAT                   |
| 124 | AAGAGGAACGAGCTTCAAAGCGAAGATACATT                  |
| 125 | GGAATTACTCGTTTACCAGACGACAAAAGATT                  |
| 126 | GAATAAGGACGTAACAAAGCTGCTCTAAAACA                  |
| 127 | CCAAATCACTTGCCCTGACGAGAACGCCAAAA                  |
| 128 | CTCATCTTGAGGCAAAAGAATACAGTGAATTT                  |
| 129 | AAACGAAATGACCCCGAGCGATTATTCATTAC                  |
| 130 | CTTAAACATCAGCTTGCTTTGAGCGTAACAC                   |
| 131 | TCGGTTTAGCTTGATACCGATAGTCCAACCTA                  |
| 132 | TGAGTTTCGTCACCAGTACAACTTAATTGTA                   |
| 133 | CCCCGATTTAGAGCTTGACGGGGAAATCAAAA                  |
| 134 | GAATAGCCGCAAGCGGTCCACGCTCCTAATGA                  |
| 135 | GAGTTGCACGAGATAGGGTTGAGTAAGGGAGC                  |
| 136 | GTGAGCTAGTTTCTGTGTGAAATTTGGGAAG                   |
| 137 | TCATAGCTACTCACATTAATTGCGCCCTGAGA                  |
| 138 | GGCGATCGCACTCCAGCCAGCTTTGCCATCAA                  |
| 139 | GAAGATCGGTGCGGGCCTTTCGCAATCATGG                   |
| 140 | AAATAATTTTAAATTGTAAACGTTGATATTCA                  |
| 141 | GCAAATATCGCGTCTGGCCTTCCTGGCCTCAG                  |
| 142 | ACCGTTCTAAATGCAATGCCTGAGAGGTGGCA                  |
| 143 | TATATTTTAGCTGATAAATTAATGTTGTATAA                  |
| 144 | TCAATTCTTTTAGTTTGACCATTACCAGACCG                  |
| 145 | CGAGTAGAACTAATAGTAGTAGCAAACCTCA                   |
| 146 | GAAGCAAAAAGCGGATTGCATCAGATAAAAA                   |
| 147 | TCAGAAGCCTCCAACAGGTCAGGATCTGCGAA                  |
| 148 | CCAAAATATAATGCAGATACATAAACACCAGA                  |
| 149 | CATTC AACGCGAGAGGCTTTTGCATATTATAG                 |
| 150 | ACGAGTAGTGACAAGAACCGGATATACCAAGC                  |
| 151 | AGTAATCTTAAATTGGGCTTGAGAGAATACCA                  |
| 152 | GCGAAACATGCCACTACGAAGGCATGCGCCGA                  |
| 153 | ATACGTAAAAGTACAACGGAGATTTTCATCAAG                 |
| 154 | CAATGACACTCCAAAAGGAGCCTTACAACGCC                  |
| 155 | AAAAAAGGACAACCATCGCCACGCGGGTAAA                   |
| 156 | TGTAGCATTCCACAGACAGCCCTCATCTCAA                   |
| 157 | GTAAGCACTAAATCGGAACCCTAGTTGTTCC                   |
| 158 | AGTTTGGAGCCCTTCACCGCCTGGTTGCGCTC                  |
| 159 | AGCTGATTACAAGAGTCCACTATTGAGGTGCC                  |
| 160 | ACTGCCCGCCGAGCTCGAATTCGTTATTACGC                  |
| 161 | CCCGGGTACTTTCCAGTCGGGAAACGGGCAAC                  |

## SUPPORTING INFORMATION

|     |                                                   |
|-----|---------------------------------------------------|
| 162 | CAGCTGGCGGACGACGACAGTATCGTAGCCAG                  |
| 163 | GTTTGAGGGAAAGGGGGATGTGCTAGAGGATC                  |
| 164 | CTTTCATCCCCAAAAACAGGAAGACCGGAGAG                  |
| 165 | AGAAAAGCAACATTAATGTGAGCATCTGCCA                   |
| 166 | GGTAGCTAGGATAAAAAATTTTGTAGTTAACATC                |
| 167 | CAACGCAATTTTTGAGAGATCTACTGATAATC                  |
| 168 | CAATAAATACAGTTGATTCCAATTTAGAGAG                   |
| 169 | TCCATATACATACAGGCAAGGCAACTTTATTT                  |
| 170 | TACCTTTAAGGTCTTTACCCTGACAAAGAAGT                  |
| 171 | CAAAAATCATTGCTCCTTTTGATAAGTTTCAT                  |
| 172 | TTTGCCAGATCAGTTGAGATTTAGTGGTTTAA                  |
| 173 | AAAGATTCAGGGGGTAATAGTAAACCATAAAT                  |
| 174 | TTTCAACTATAGGCTGGCTGACCTTGATCAT                   |
| 175 | CCAGGCGCTTAATCATTGTGAATTACAGGTAG                  |
| 176 | CGCCTGATGGAAGTTTCCATTAACATAACCG                   |
| 177 | TTTCATGAAAATTGTGTGCAAAATCTGTACAGA                 |
| 178 | ATATATTCTTTTTTCACGTTGAAAATAGTTAG                  |
| 179 | AATAATAAGGTCGCTGAGGCTTGCAAAGACTT                  |
| 180 | CGTAACGATCTAAAGTTTTGTGCTGAATTGCG                  |
| 181 | ACCCAAATCAAGTTTTTTGGGGTCAAAGAACG                  |
| 182 | TGGACTCCCTTTTACCAGTGAGACCTGTGCT                   |
| 183 | TGGTTTTTAACGTCAAAGGGCGAAGAACCATC                  |
| 184 | GCCAGCTGCCTGCAGGTCGACTCTGCAAGGCG                  |
| 185 | CTTGCATGCATTAATGAATCGGCCCGCCAGGG                  |
| 186 | ATTAAGTTCGCATCGTAACCGTGCGAGTAACA                  |
| 187 | TAGATGGGGGGTAACGCCAGGGTTGTGCCAAG                  |
| 188 | ACCCGTCGTCATATGTACCCCGGTAAAGGCTA                  |
| 189 | CATGTCAAGATTCTCCGTGGGAACCGTTGGTG                  |
| 190 | TCAGGTCACTTTTGCGGGAGAAGCAGAATTAG                  |
| 191 | CTGTAATATTGCCTGAGAGTCTGGAAAACCTAG                 |
| 192 | CAAAATTAAGTACGGTGTCTGGAAGAGGTCA                   |
| 193 | TGCAACTAAGCAATAAAGCCTCAGTTATGACC                  |
| 194 | TTTTTGCGCAGAAAACGAGAATGAATGTTTAG                  |
| 195 | AAACAGTTGATGGCTTAGAGCTTATTTAAATA                  |
| 196 | ACTGGATAACGGAACAACATTATTACCTTATG                  |
| 197 | ACGAACTAGCGTCCAATACTGCGGAATGCTTT                  |
| 198 | CGATTTTAGAGGACAGATGAACGGCGCGACCT                  |
| 199 | CTTTGAAAAGAAGTGGCTCATTATTTAATAAA                  |
| 200 | GCTCCATGAGAGGCTTTGAGGACTAGGGAGTT                  |
| 201 | ACGGCTACTTACTTAGCCGGAACGCTGACCAA                  |
| 202 | AAAGGCCGAAAGGAACAACCTAAAGCTTTCCAG                 |
| 203 | GAGAATAGCTTTTGCGGGATCGTCGGGTAGCA                  |
| 204 | ACGTTAGTAAATGAATTTTCTGTAAGCGGAGT                  |
| 205 | TTTTCGATGGCCCACTACGTAACCCGTC                      |
| 206 | TATCAGGGTTTTCGGTTTGCATTTGGGAACGCGCG               |
| 207 | GGGAGAGGTTTTTGTAAAACGACGGCCATTCCAGT               |
| 208 | CACGACGTTTTTGTAAATGGGATAGGTCAAACGGCG              |
| 209 | GATTGACCTTTTGTAAACGGTAATCGTAGCAAACA               |
| 210 | AGAGAATCTTTTGGTTGTACCAAAAACAAGCATAAA              |
| 211 | GCTAAATCTTTTCTGTAGCTCAACATGTATTGCTGA              |
| 212 | ATATAATGTTTTTATTGAATCCCCTCAAATCGTCA               |
| 213 | TAAATATTTTTTGAAGAAAAATCTACGACCAGTCA               |
| 214 | GGACGTTGTTTTTTCATAAGGGAACCGAAAGGCGCAG             |
| 215 | ACGGTCAATTTTACAGCATCGGAACGAACCCCTCAG              |
| 216 | CAGCGAAAATTTTACTTTTCAACAGTTTCTGGGATTTTGCTAAACTTTT |
| 217 | AACATCACTTGCCTGAGTAGAAGAAGT                       |
| 218 | TGTAGCAATACTTCTTTGATTAGTAAT                       |
| 219 | AGTCTGTCCATCACGCAAATTAACCGT                       |
| 220 | ATAATCAGTGAGGCCACCGAGTAAAAG                       |

## SUPPORTING INFORMATION

|       |                                      |
|-------|--------------------------------------|
| 221   | ACGCCAGAATCCTGAGAAGTGTTTT            |
| 222   | TTAAAGGGATTTTAGACAGGAACGGT           |
| 223   | AGAGCGGGAGCTAAACAGGAGGCCGA           |
| 224   | TATAACGTGCTTTCTCGTTAGAATC            |
| 225   | GTACTATGGTTGCTTTGACGAGCACG           |
| 226   | GCGCTTAATGCGCCGCTACAGGGCGC           |
| F1    | CGGCCTTGATAGGAACCCATGTACAAACAGTT     |
| F25   | TGAGTTTCCGAGAAAGGAAGGGAACAACTAT      |
| F27   | CAAGCCCACTGGTAATATCCAGAACGAACTGA     |
| F28   | CCGCCAGCCACCACCCTCATTTTCCTATTATT     |
| F51   | CTCAGAGCCATTGCAACAGGAAAAATATTTTT     |
| F52   | GGAAATACACCGCCACCCTCAGAACTGAGACT     |
| F75   | CCCTCAGACTACATTTTGACGCTCACCTGAAA     |
| F76   | GAAATGGATACTCAGGAGGTTTAGCGGGGTTT     |
| F99   | TATCACCGTTATTTACATTGGCAGACATTCTG     |
| F132  | GAACGTGGGTCACCAGTACAACTTAATTGTA      |
| F133  | TGTAGCATTAGAGCTTGACGGGGAATCAAAA      |
| F156  | CCCCGATTTCCACAGACAGCCCTCATCTCCAA     |
| F157  | CGTAACGACTAAATCGGAACCCTAGTTGTTCC     |
| F180  | GTAAAGCATCTAAAGTTTTGTCGTGAATTGCG     |
| F181  | ACGTTAGTCAAGTTTTTTGGGGTCAAAGAACG     |
| F204  | ACCCAAATAAATGAATTTTCTGTAAGCGGAGT     |
| F100  | GTCACACGTTTTTATAAGTATAGCCCGGCCGTCGAG |
| F205  | TGCTAAACTTTTCGATGGCCCACTACGTAAACCGTC |
| N-111 | AAACCCTCTTTTACCAGTAATAAAAGGGATTACCA  |
| N-216 | CAGCGAAATTTTAACTTTCAACAGTTTCTGGGATT  |

## References

- [1] G. Bellot, M. A. McClintock, J. J. Chou, W. M. Shih, *Nat. Protoc.* **2013**, *8*, 755-770.  
 [2] E. Stahl, T. G. Martin, F. Praetorius, H. Dietz, *Angew. Chem. Int. Ed.* **2014**, *53*, 12735-12740.  
 [3] a) H. Lee, S. M. Dellatore, W. M. Miller, P. B. Messersmith, *Science* **2007**, *318*, 426-430; b) D. R. Dreyer, D. J. Miller, B. D. Freeman, D. R. Paul, C. W. Bielawski, *Langmuir* **2012**, *28*, 6428-6435; c) S. Hong, Y. S. Na, S. Choi, I. T. Song, W. Y. Kim, H. Lee, *Adv. Funct. Mater.* **2012**, *22*, 4711-4717.

## Author Contributions

P. W. conducted all the experiments and analysis assisted by S. H. on the experimental design. The project was supervised by D.Y.W.N. and T.W. All authors contributed to writing the manuscript.
